# Supplementary material for: On the structure of water and chloride ion interactions with a peptide backbone in solution
Source: Royal Society of Chemistry journal article supplement (doi:10.1039/c3cp53831a), 2013-01-01
Supplement: c3cp53831a.pdf [file c3cp53831a.pdf]

# Supplementary Information

## On the structure of water and chloride ion interactions with a peptide backbone in solution

Sebastian Busch,<sup>a</sup> Luis Carlos Pardo,<sup>b</sup> William B. O'Dell,<sup>c</sup> Chrystal D. Bruce,<sup>d</sup> Christian D. Lorenz<sup>e\*</sup> and Sylvia E. McLain<sup>a\*</sup>

Received Xth XXXXXXXXXX 20XX, Accepted Xth XXXXXXXXXX 20XX

First published on the web Xth XXXXXXXXXX 20XX

DOI: 10.1039/b000000x

### Contents

|   |                           |   |
|---|---------------------------|---|
| 1 | Diffraction patterns      | 2 |
| 2 | Water mediation N–Cl      | 3 |
| 3 | Chloride mediation N–N    | 4 |
| 4 | Spatial Distribution Maps | 5 |

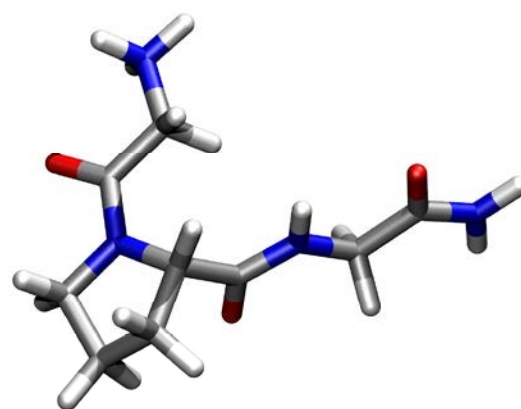

*cis* GPG

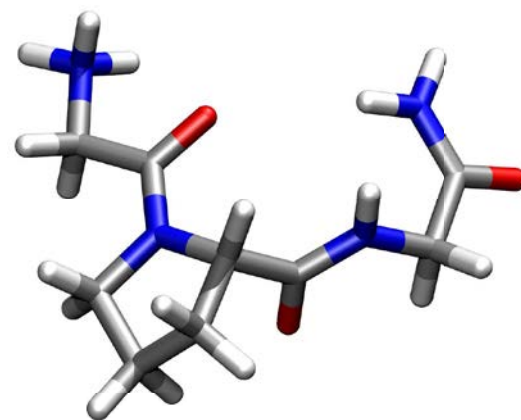

*trans* GPG

<sup>a</sup> Department of Biochemistry, University of Oxford, Oxford OX1 3QU, UK

<sup>b</sup> Departament de Física i Enginyeria Nuclear, Escola Tècnica Superior d'Enginyeria Industrial de Barcelona (ETSEIB), Universitat Politècnica de Catalunya, 08028 Barcelona, Catalonia (Spain)

<sup>c</sup> Department of Molecular and Structural Biochemistry, North Carolina State University, Raleigh, NC 27695, USA

<sup>d</sup> Department of Chemistry, John Carroll University, University Heights, OH 44118 USA

<sup>e</sup> Department of Physics, King's College London, London SE1 9NH, UK

\*Email: [chris.lorenz@kcl.ac.uk](mailto:chris.lorenz@kcl.ac.uk) and [sylvia.mclain@bioch.ox.ac.uk](mailto:sylvia.mclain@bioch.ox.ac.uk)

## 1 Diffraction patterns

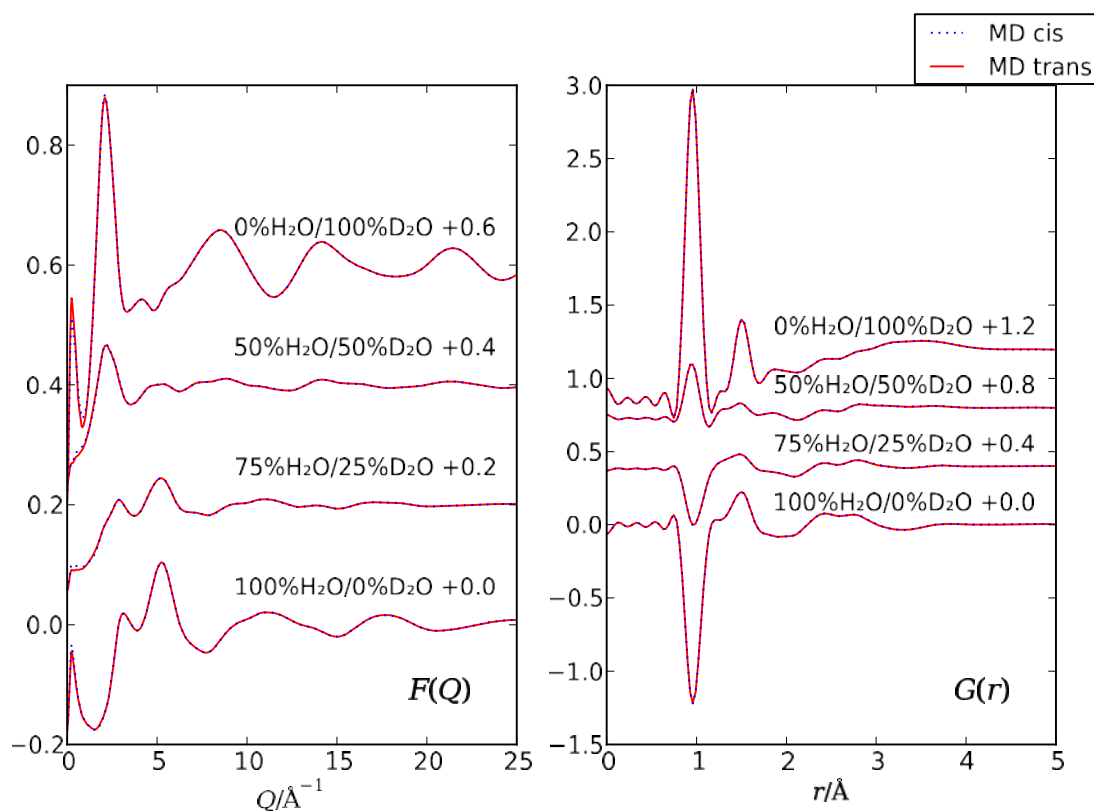

The calculated  $F(Q)$  and  $G(r)$  of *cis* and *trans* GPG MD simulations are virtually indistinguishable. These quantities are weighted sums of average distances.

## 2 Water mediation N-Cl

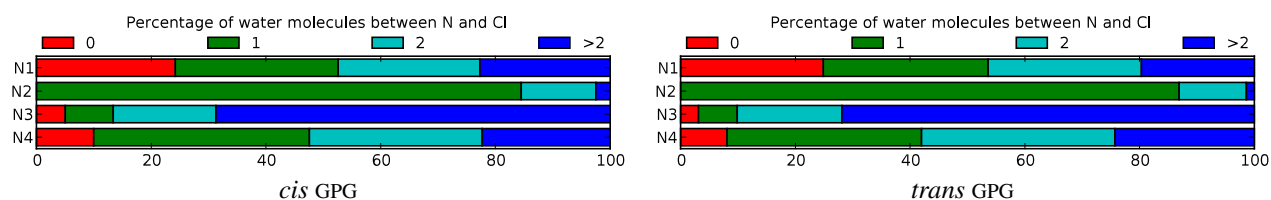

The distribution of percentages of water molecules that are between a given nitrogen and the next chloride ion is virtually unaffected by the conformational state of GPG.

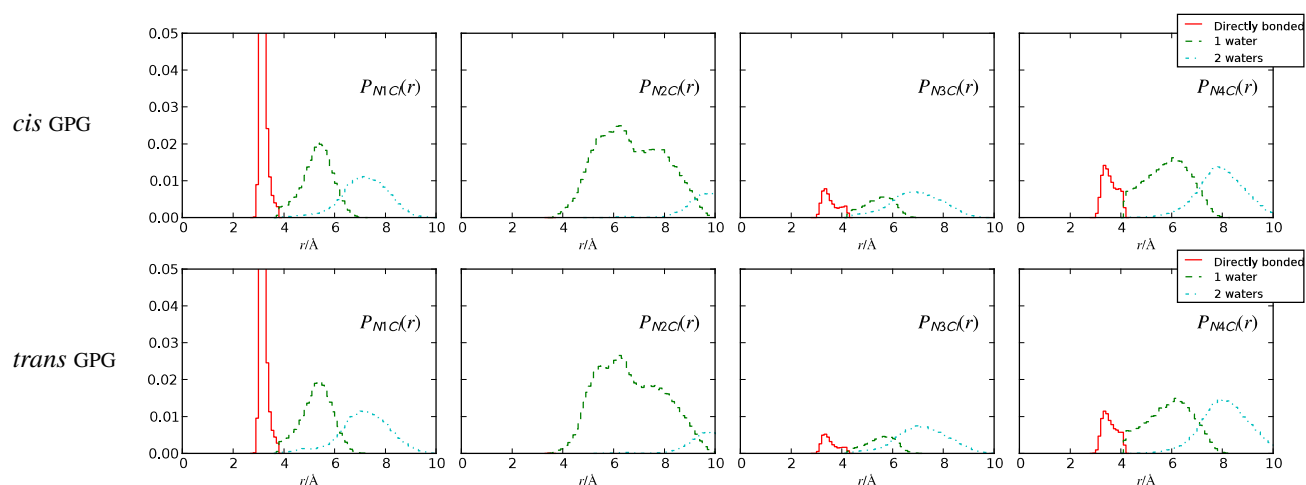

The distance distributions of chloride ions that are either in direct contact with a given nitrogen atom or are removed by 1 or 2 water molecules is not sensitive to the *cis trans* isomerisation.

3 Chloride mediation N–N

|    | N1         | N2        | N3        | N4  |
|----|------------|-----------|-----------|-----|
| N1 | 5%         | 7%        | 2%        | 12% |
| N2 | <b>25%</b> | 7%        | 0%        | 11% |
| N3 | <b>1%</b>  | <b>3%</b> | 0%        | 1%  |
| N4 | <b>4%</b>  | <b>4%</b> | <b>5%</b> | 6%  |

*cis* GPG

|    | N1         | N2        | N3        | N4  |
|----|------------|-----------|-----------|-----|
| N1 | 6%         | 8%        | 1%        | 12% |
| N2 | <b>29%</b> | 9%        | 0%        | 11% |
| N3 | <b>0%</b>  | <b>3%</b> | 0%        | 1%  |
| N4 | <b>2%</b>  | <b>4%</b> | <b>4%</b> | 5%  |

*trans* GPG

The fraction of Cl<sup>−</sup> ions that are within up to two water molecules of a nitrogen Ni and simultaneously within up to two water molecules of a different Nj. Neither the inter- (normal face) nor intra-molecular (bold face) numbers change appreciable. The biggest difference between *cis* and *trans* can be seen in the intramolecular N1–N2 term which is slightly more populated in the *trans* state.

## 4 Spatial Distribution Maps

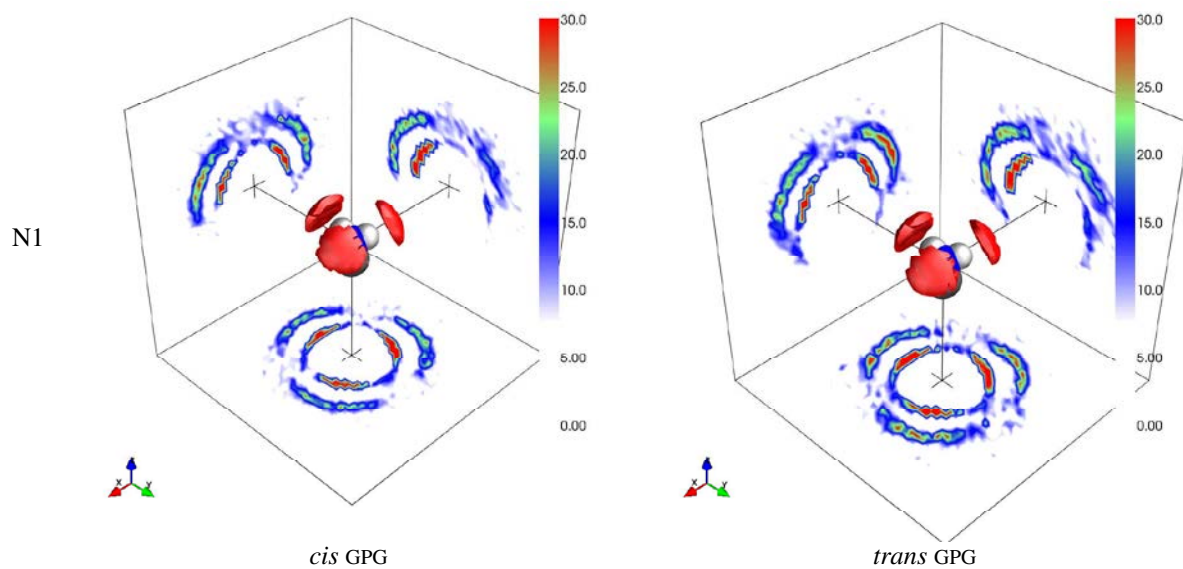

There is no visible difference in the chloride distribution around the  $\text{NH}_3^+$  group.

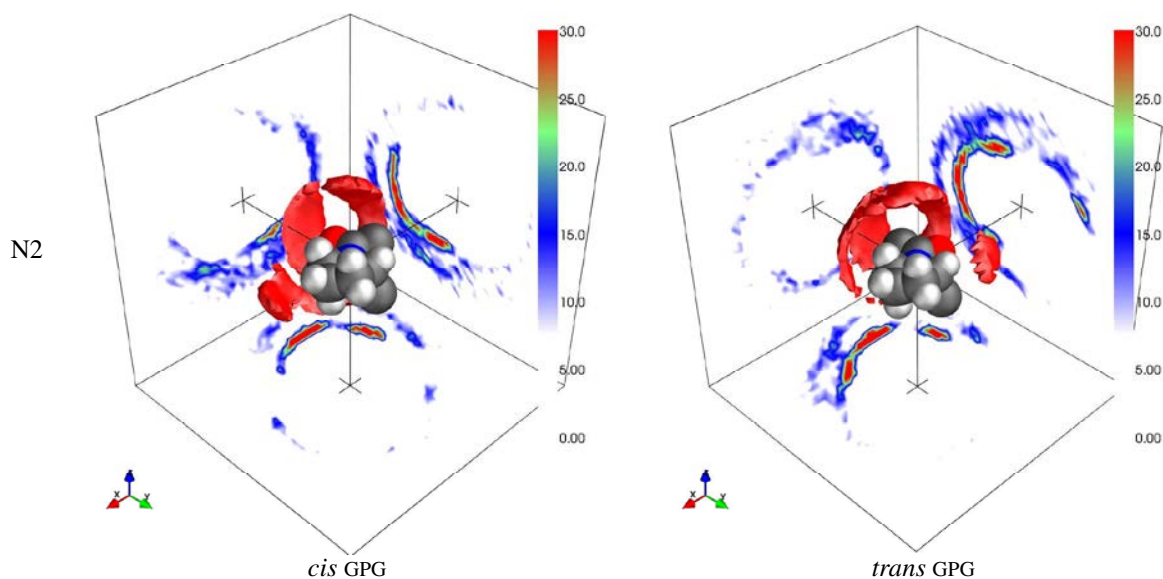

As discussed in the main text, a small patch of chloride density is at a different position in the *cis* and *trans* state of GPG. While it is in front of the proline ring in the *cis* state, it can be found above the continuation of the backbone in *trans* GPG.

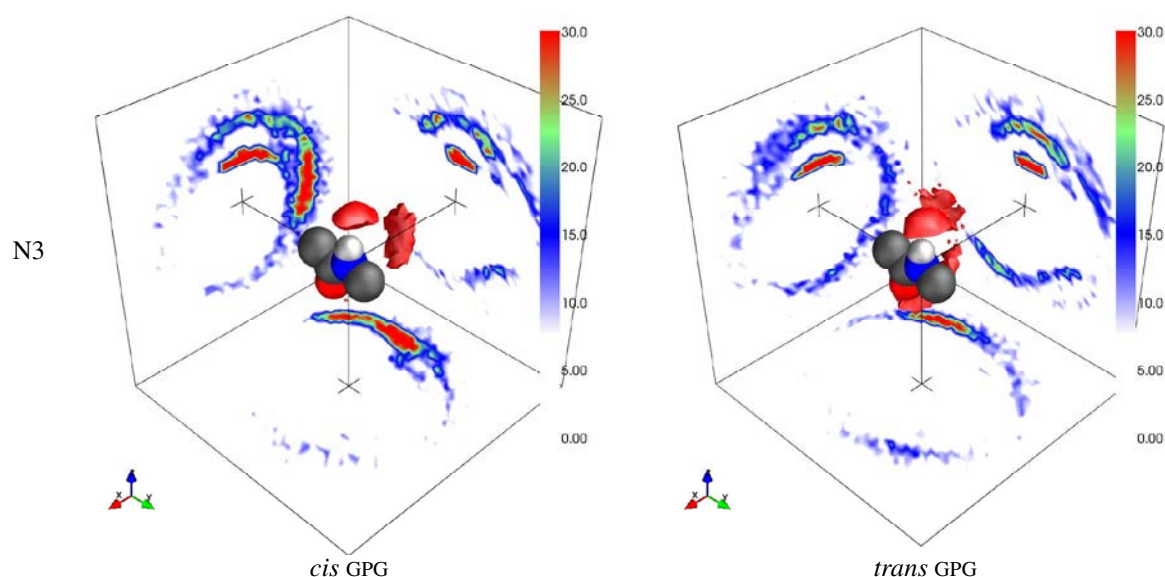

Although the cuts through the chloride density look somewhat different between *cis* and *trans* GPG, the three-dimensional picture shows that there is no qualitative change in the distribution, only a small shift of the high density areas. This small shift brings about that they are well visible in the cuts of the *cis* state while they are not directly in the cut plane in the *trans* state.

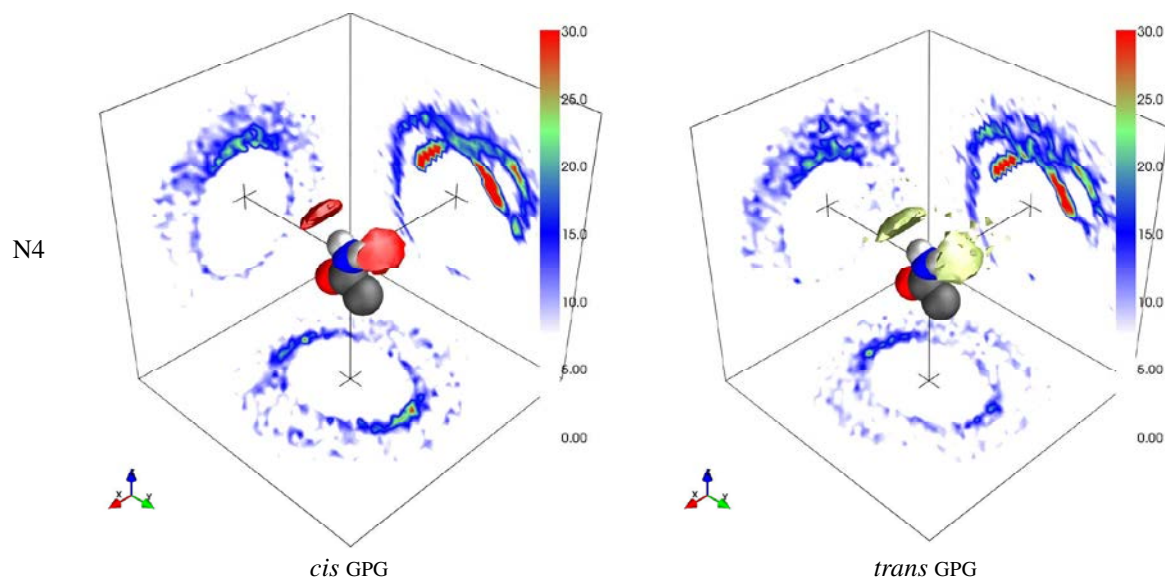

The positions of high chloride density are the same around the  $\text{NH}_2$  groups of *cis* and *trans* GPG. Both cuts contain the top 5% of chloride density. As indicated by the colour of the isosurface, this is achieved at slightly different contourlevels. The cuts through the chloride density show however that this difference is not significant.
